# Supplementary figures and images for: Pulsed laser ablation synthesis of magnesiowüstite based phases with special defect clusters, interfaces and internal stress: implications for natural occurrence and engineering applications
Source: Royal Society of Chemistry journal article supplement (doi:10.1039/c4ce02476a), 2015-01-01

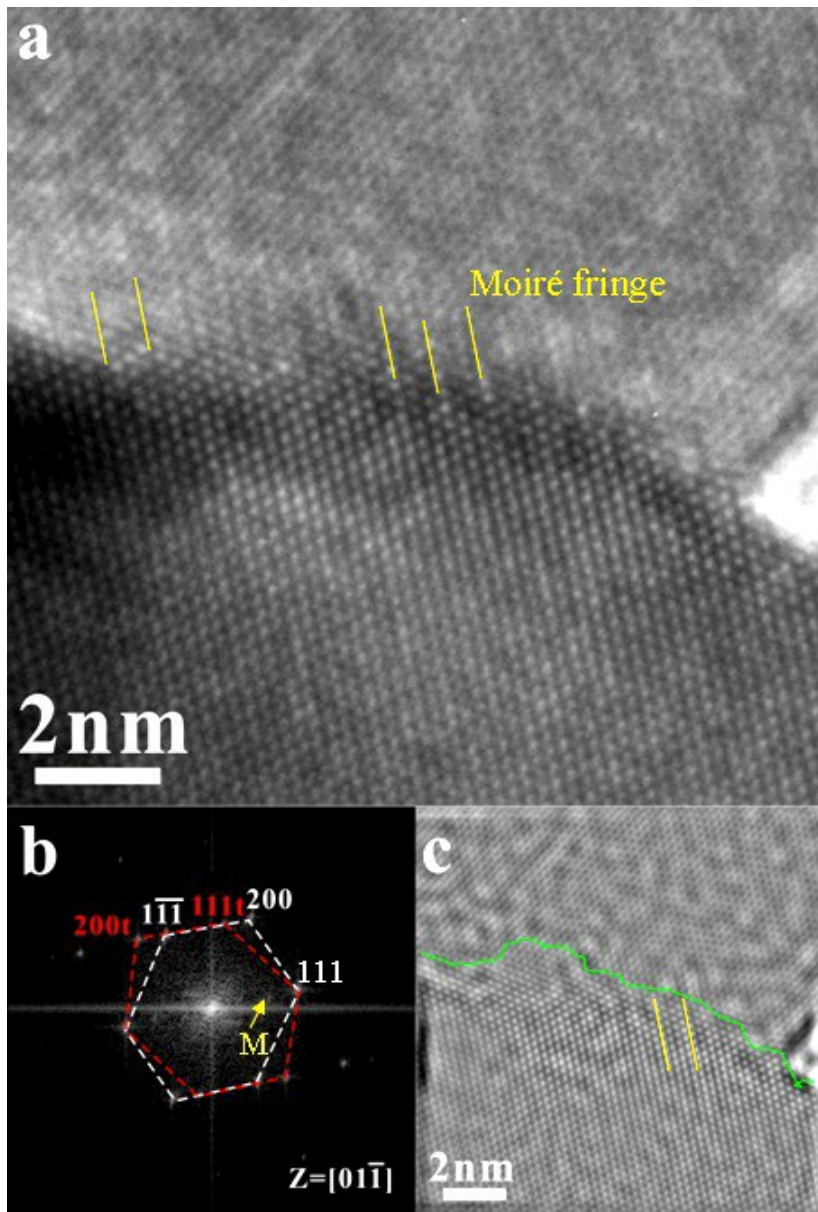

Supplement: c4ce02476a1.pdf [file c4ce02476a1.pdf]

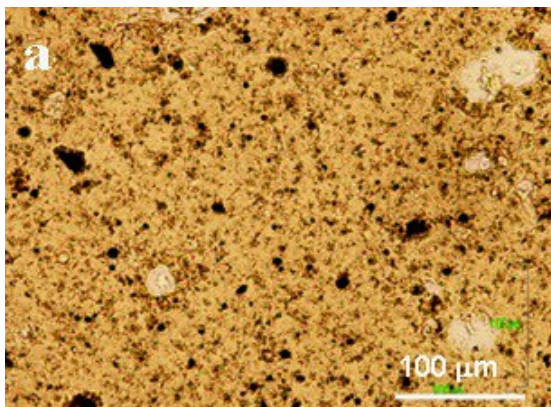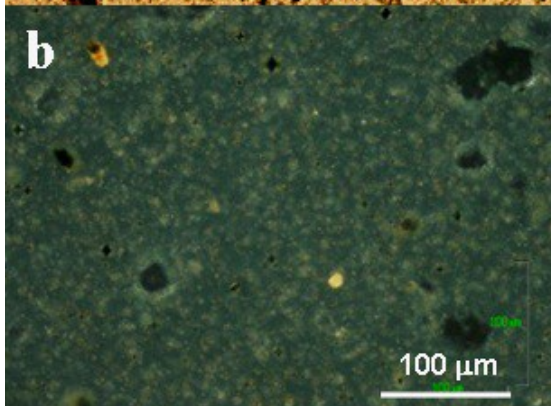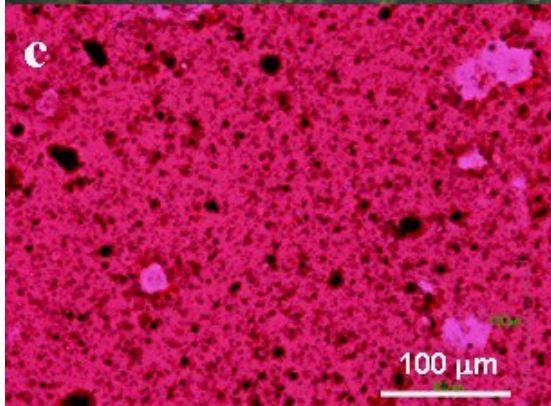

Supplement: c4ce02476a2.pdf [file c4ce02476a2.pdf]
